# Supplementary material
Source: PubMed Central journal article supplement (PMC2993592)
Supplement: JCI43464sd.pdf [file JCI43464sd.pdf]

Supplemental Figure 1

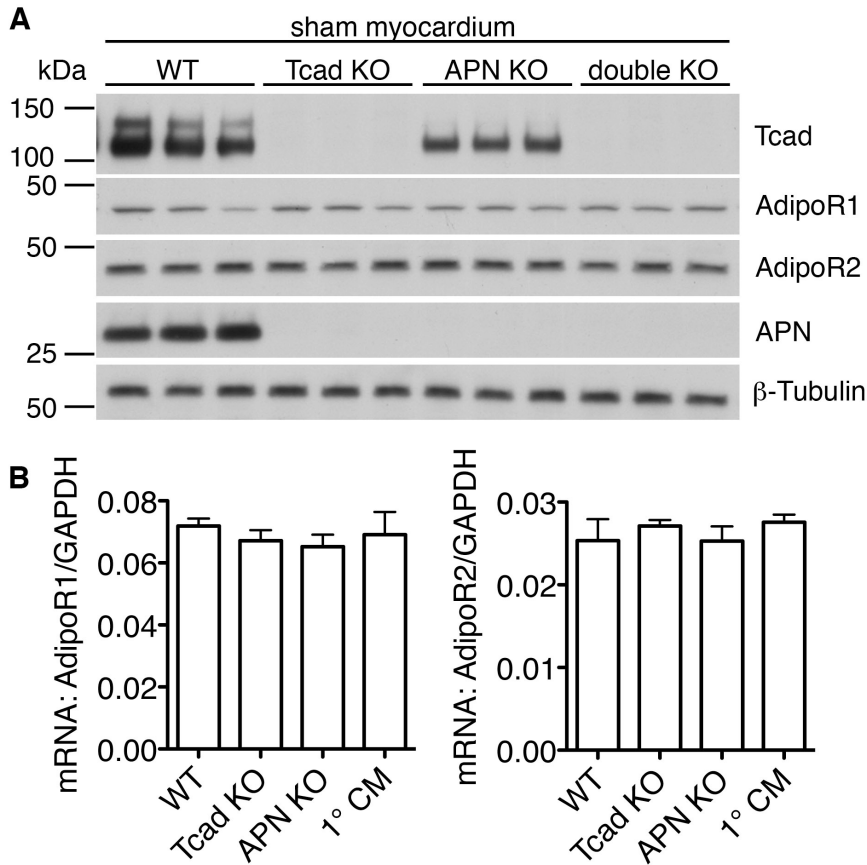

**Supplemental Figure 1.** AdipoR1/2 in the heart. **(A)** Immunoblot of WT, Tcad-KO, APN-KO, and Tcad/APN dKO myocardial lysates for T-cadherin, AdipoR1 and AdipoR2 protein expression. **(B)** Expression levels of AdipoR1 and AdipoR2 mRNA in hearts of WT, Tcad-KO, APN-KO mice and in isolated WT cardiomyocytes (1° CM).

## Supplemental Figure 2

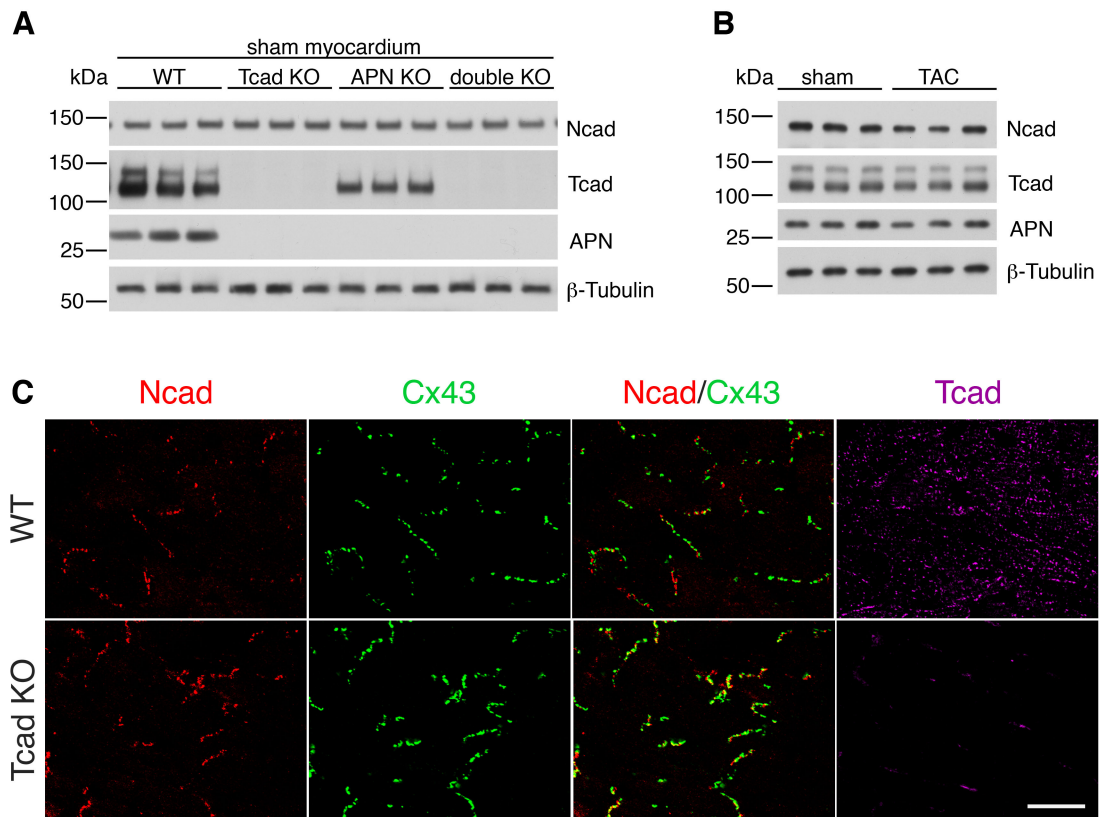

**Supplemental Figure 2.** N-cadherin is unchanged in Tcad-KO hearts. **(A)** Immunoblot of WT, Tcad-KO, APN-KO, and Tcad/APN dKO sham myocardial lysates for N-cadherin, T-cadherin, and APN protein. **(B)** N-cadherin, T-cadherin, and APN immunoblot of WT myocardial lysates seven days after sham or TAC surgery. **(C)** Immunostaining of WT and Tcad-KO heart sections using N-cadherin, connexin 43, and T-cadherin antibodies. Bar, 10  $\mu$ m.

Supplemental Figure 3

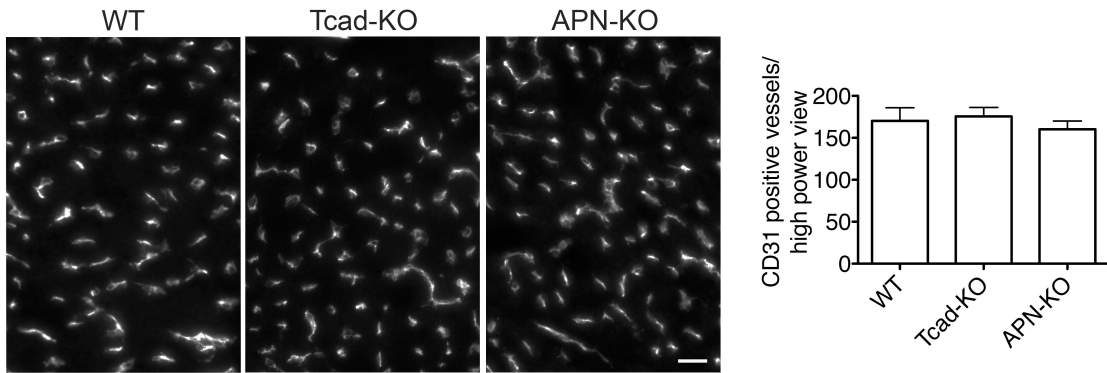

**Supplemental Figure 3.** Vascular density after 7 days of TAC. Representative images from the interventricular septum of WT, Tcad-KO and APN-KO hearts stained with CD31 antibody. Bar, 5  $\mu$ m. Quantification shows no difference between genotypes.

## Supplemental Table 1

Body weight and echocardiographic measurements in WT, Tcad-KO, APN-KO mice before and 7 days after TAC surgery.

|                      | BW<br>(g) | HR<br>(bpm) | IVSd<br>(mm)        | IVSs<br>(mm)      | LVIDd<br>(mm) | LVIDs<br>(mm) | LVPWd<br>(mm)      | LVPWs<br>(mm)   | FS<br>(%) | EDD/PWD        | LVM/BW<br>(%)       |
|----------------------|-----------|-------------|---------------------|-------------------|---------------|---------------|--------------------|-----------------|-----------|----------------|---------------------|
| WT cntl<br>n=10      | 28.5±1    | 509±24      | 0.62±0.02           | 1.08±0.02         | 3.76±0.02     | 2.33±0.08     | 0.69±0.03          | 1.1±0.03        | 38.2±1    | 5.53±0.21      | 0.29±0.02           |
| Tcad KO cntl<br>n=12 | 26.2±0.7  | 537±21      | 0.66±0.02           | 1.14±0.04         | 3.58±0.08     | 2.2±0.11      | 0.72±0.03          | 1.14±0.04       | 38.8±1.8  | 5.04±0.22      | 0.31±0.02           |
| APN-KO cntl<br>n=6   | 27.6±0.9  | 515±31      | 0.72±0.05           | 1.18±0.08         | 3.75±0.12     | 2.37±0.16     | 0.74±0.03          | 1.14±0.08       | 37.1±2.7  | 5±0.28         | 0.31±0.04           |
| WT TAC<br>n=10       | 28±1      | 474±21      | 0.79±0.03<br>***    | 1.19±0.04         | 3.94±0.09     | 2.7±0.16      | 0.81±0.04<br>*     | 1.12±0.05       | 31.8±3    | 5.14±0.23      | 0.39±0.02<br>*      |
| Tcad-KO TAC<br>n=12  | 26.5±1    | 521±39      | 0.82±0.03<br>***    | 1.35±0.05<br>** † | 3.68±0.07     | 2.36±0.07     | 0.92±0.05<br>*** † | 1.26±0.03       | 35.9±1.6  | 4.37±0.19<br>† | 0.47±0.02<br>***    |
| APN-KO TAC<br>n=6    | 28±0.9    | 526±33      | 1.0±0.05<br>*** ††† | 1.5±0.1<br>** ††† | 4.1±0.2       | 2.7±0.27      | 0.96±0.03<br>** †  | 1.34±0.04<br>†† | 35.1±4.3  | 4.3±0.13<br>†  | 0.52±0.03<br>*** †† |

\* $P<0.05$ ; \*\* $P<0.01$ ; \*\*\* $P<0.001$  vs. control (cntl = before TAC)

† $P<0.05$ ; †† $P<0.01$ ; ††† $P<0.001$  vs. WT TAC

values are mean ± s.e.m

Supplemental Table 2

Serum APN levels in adGFP or adAPN treated APN null or T-cad/APN dKO mice 10 days after injection.

|              | <b>cntl</b>   | <b>adGFP</b> | <b>adAPN</b>   |
|--------------|---------------|--------------|----------------|
| WT           | 5.6±0.05 (6)  | --           | --             |
| T-cad KO     | 19.4±0.82 (4) | --           | --             |
| APN KO       | n.d.          | n.d.         | 11.6±0.59 (9)  |
| T-cad/APN KO | n.d.          | n.d.         | 11.5±0.44 (11) |

All values are APN in µg/mL. Results are presented as mean ± s.d.; n in parentheses

### Supplemental Table 3

Body weight and echocardiographic measurements in WT, Tcad-KO, APN-KO mice 28 days after TAC surgery.

|                    | BW<br>(g) | HR<br>(bpm) | IVSd<br>(mm) | IVSs<br>(mm) | LVIDd<br>(mm)  | LVIDs<br>(mm)  | LVPWd<br>(mm) | LVPWs<br>(mm) | FS<br>(%)     | EDD/PWD   | LVM/BW<br>(%)  |
|--------------------|-----------|-------------|--------------|--------------|----------------|----------------|---------------|---------------|---------------|-----------|----------------|
| WT TAC<br>n=4      | 29.1±0.6  | 532±35      | 0.79±0.08    | 1.05±0.11    | 4.09±0.16      | 3.13±0.12      | 0.78±0.1      | 1.06±0.1      | 24.4±0.9      | 5.52±0.69 | 0.41±0.06      |
| Tcad-KO TAC<br>n=4 | 28.9±1    | 627±38      | 1.02±0.15    | 1.36±0.14    | 4.97±0.19<br>* | 4.09±0.27<br>* | 0.87±0.06     | 1.14±0.06     | 16.1±1.8<br>* | 5.78±0.32 | 0.87±0.09<br>* |
| APN-KO TAC<br>n=4  | 25.7±1.1  | 551±22      | 0.93±0.13    | 1.38±0.21    | 4.91±0.16<br>* | 4.14±0.48      | 1.04±0.15     | 1.25±0.14     | 16.21±2<br>*  | 5.72±1.3  | 0.89±0.12<br>* |

\*P<0.05 vs. WT  
values are mean ± s.e.m
